# Supplementary material for: Insulin Resistance Is Associated with an Unfavorable Serum Lipoprotein Lipid Profile in Women with Newly Diagnosed Gestational Diabetes
Source: MDPI journal article supplement (doi:10.3390/biom13030470), 2023-03-03
Supplement: s1 [file s1]

**Supplementary table S1 – Unadjusted and adjusted associations between insulin resistance and serum metabolites, and mean concentrations of serum metabolites**

Regression coefficients values (beta) with 95% confidence intervals (CI) are given for unadjusted model and model adjusted for BMI class and gestational age at sampling. VLDL: very-low-density lipoprotein, LDL: low-density lipoprotein, IDL: intermediate-density lipoprotein, HDL: high-density lipoprotein. FA: fatty acids, SFA: saturated FA, MUFA: monounsaturated FA, PUFA: polyunsaturated FA, BCAA: branched-chain amino acids, S/M/L: small/medium/large, XS: very small, XL: very large, XXL: extremely large.

| Metabolite                                   | Mean ± SD   | unit   | n   | Unadjusted model      |         | n   | Adjusted model        |         | n   |
|----------------------------------------------|-------------|--------|-----|-----------------------|---------|-----|-----------------------|---------|-----|
|                                              |             |        |     | beta [95% CI]         | p-value |     | beta [95% CI]         | p-value |     |
| Total cholesterol                            | 6.61 ± 1.29 | mmol/l | 300 | -0.098 [-0.22; 0.023] | 0.091   | 300 | -0.11 [-0.24; 0.019]  | 0.094   | 297 |
| Total cholesterol minus HDL-C                | 5.18 ± 1.29 | mmol/l | 300 | -0.046 [-0.17; 0.072] | 0.43    | 300 | -0.049 [-0.19; 0.078] | 0.44    | 297 |
| Remnant cholesterol                          | 2.69 ± 0.67 | mmol/l | 300 | -0.012 [-0.13; 0.11]  | 0.84    | 300 | -0.010 [-0.14; 0.12]  | 0.87    | 297 |
| VLDL cholesterol                             | 1.45 ± 0.42 | mmol/l | 300 | 0.10 [-0.019; 0.22]   | 0.082   | 300 | 0.11 [-0.028; 0.24]   | 0.080   | 297 |
| Clinical LDL cholesterol                     | 3.73 ± 1.08 | mmol/l | 300 | -0.12 [-0.24; -0.000] | 0.035   | 300 | -0.13 [-0.26; 0.001]  | 0.038   | 297 |
| LDL cholesterol                              | 2.49 ± 0.63 | mmol/l | 300 | -0.082 [-0.20; 0.042] | 0.16    | 300 | -0.089 [-0.22; 0.039] | 0.16    | 297 |
| HDL cholesterol                              | 1.43 ± 0.28 | mmol/l | 300 | -0.23 [-0.34; -0.13]  | <0.0001 | 300 | -0.26 [-0.38; -0.14]  | <0.0001 | 297 |
| Total triglycerides                          | 2.27 ± 0.75 | mmol/l | 300 | 0.31 [0.20; 0.42]     | <0.0001 | 300 | 0.33 [0.21; 0.47]     | <0.0001 | 297 |
| Triglycerides in VLDL                        | 1.50 ± 0.63 | mmol/l | 300 | 0.33 [0.23; 0.44]     | <0.0001 | 300 | 0.35 [0.23; 0.49]     | <0.0001 | 297 |
| Triglycerides in LDL                         | 301 ± 68    | μmol/l | 300 | 0.13 [0.011; 0.24]    | 0.022   | 300 | 0.14 [0.005; 0.27]    | 0.023   | 297 |
| Triglycerides in HDL                         | 250 ± 52    | μmol/l | 300 | 0.23 [0.12; 0.34]     | <0.0001 | 300 | 0.25 [0.12; 0.37]     | <0.0001 | 297 |
| Total phospholipids in lipoprotein particles | 3.80 ± 0.52 | mmol/l | 300 | -0.017 [-0.14; 0.099] | 0.77    | 300 | -0.024 [-0.15; 0.099] | 0.71    | 297 |
| Phospholipids in VLDL                        | 855 ± 256   | μmol/l | 300 | 0.20 [0.081; 0.32]    | 0.00050 | 300 | 0.21 [0.080; 0.34]    | 0.00061 | 297 |
| Phospholipids in LDL                         | 795 ± 182   | μmol/l | 300 | -0.090 [-0.20; 0.029] | 0.12    | 300 | -0.097 [-0.23; 0.038] | 0.12    | 297 |
| Phospholipids in HDL                         | 1.70 ± 0.29 | mmol/l | 300 | -0.11 [-0.22; 0.005]  | 0.065   | 300 | -0.12 [-0.24; -0.000] | 0.056   | 297 |
| Total lipids in lipoprotein particles        | 12.7 ± 2.2  | mmol/l | 300 | 0.045 [-0.077; 0.16]  | 0.44    | 300 | 0.043 [-0.090; 0.16]  | 0.49    | 297 |
| Total lipids in VLDL                         | 3.81 ± 1.23 | mmol/l | 300 | 0.25 [0.13; 0.36]     | <0.0001 | 300 | 0.26 [0.14; 0.40]     | <0.0001 | 297 |
| Total lipids in LDL                          | 3.58 ± 0.86 | mmol/l | 300 | -0.068 [-0.19; 0.048] | 0.24    | 300 | -0.074 [-0.20; 0.057] | 0.24    | 297 |
| Total lipids in HDL                          | 3.39 ± 0.57 | mmol/l | 300 | -0.15 [-0.26; -0.041] | 0.0090  | 300 | -0.17 [-0.29; -0.047] | 0.0081  | 297 |
| Total concentration of lipoprotein particles | 23.8 ± 2.8  | μmol/l | 300 | -0.11 [-0.22; -0.004] | 0.052   | 300 | -0.14 [-0.26; -0.020] | 0.032   | 297 |
| Concentration of VLDL particles              | 387 ± 105   | nmol/l | 300 | 0.14 [0.026; 0.26]    | 0.013   | 300 | 0.16 [0.022; 0.28]    | 0.012   | 297 |
| Concentration of LDL particles               | 1.84 ± 0.49 | μmol/l | 300 | -0.046 [-0.17; 0.071] | 0.42    | 300 | -0.051 [-0.19; 0.079] | 0.42    | 297 |
| Concentration of HDL particles               | 21.0 ± 2.7  | μmol/l | 300 | -0.11 [-0.22; -0.005] | 0.059   | 300 | -0.13 [-0.25; -0.017] | 0.035   | 297 |
| Average diameter for VLDL particles          | 38.0 ± 0.9  | nm     | 300 | 0.38 [0.28; 0.49]     | <0.0001 | 300 | 0.39 [0.27; 0.52]     | <0.0001 | 297 |
| Average diameter for LDL particles           | 23.7 ± 0.1  | nm     | 300 | -0.37 [-0.49; -0.26]  | <0.0001 | 300 | -0.39 [-0.53; -0.28]  | <0.0001 | 297 |
| Average diameter for HDL particles           | 10.1 ± 0.2  | nm     | 300 | -0.21 [-0.32; -0.098] | 0.00031 | 300 | -0.21 [-0.33; -0.083] | 0.0012  | 297 |
| Phosphoglycerides                            | 3.39 ± 0.51 | mmol/l | 298 | 0.070 [-0.055; 0.19]  | 0.23    | 298 | 0.069 [-0.063; 0.19]  | 0.28    | 295 |
| Triglycerides to phosphoglycerides ratio     | 0.66 ± 0.16 | ratio  | 298 | 0.42 [0.32; 0.53]     | <0.0001 | 298 | 0.45 [0.32; 0.57]     | <0.0001 | 295 |
| Total cholines                               | 3.66 ± 0.54 | mmol/l | 299 | 0.025 [-0.10; 0.14]   | 0.67    | 299 | 0.018 [-0.12; 0.14]   | 0.77    | 296 |
| Phosphatidylcholines                         | 3.25 ± 0.49 | mmol/l | 299 | 0.033 [-0.089; 0.15]  | 0.58    | 299 | 0.030 [-0.098; 0.15]  | 0.64    | 296 |
| Sphingomyelins                               | 635 ± 105   | μmol/l | 299 | -0.10 [-0.23; 0.015]  | 0.076   | 299 | -0.13 [-0.26; -0.001] | 0.045   | 296 |
| Apolipoprotein B                             | 1.44 ± 0.38 | g/l    | 300 | -0.032 [-0.16; 0.086] | 0.58    | 300 | -0.033 [-0.17; 0.092] | 0.60    | 297 |
| Apolipoprotein A1                            | 1.51 ± 0.25 | g/l    | 300 | -0.11 [-0.22; -0.004] | 0.052   | 300 | -0.13 [-0.24; -0.004] | 0.045   | 297 |
| Apolipoprotein B to apolipoprotein A1 ratio  | 0.98 ± 0.33 | ratio  | 300 | 0.040 [-0.080; 0.16]  | 0.49    | 300 | 0.047 [-0.085; 0.18]  | 0.46    | 297 |
| Total fatty acids                            | 17.5 ± 2.7  | mmol/l | 299 | 0.17 [0.051; 0.29]    | 0.0029  | 299 | 0.18 [0.043; 0.31]    | 0.0053  | 296 |
| Degree of unsaturation                       | 1.33 ± 0.09 | degree | 299 | -0.32 [-0.43; -0.20]  | <0.0001 | 299 | -0.35 [-0.47; -0.23]  | <0.0001 | 296 |
| Omega-3 fatty acids                          | 785 ± 226   | μmol/l | 299 | -0.067 [-0.19; 0.047] | 0.25    | 299 | -0.079 [-0.20; 0.049] | 0.22    | 296 |
| Omega-6 fatty acids                          | 5.63 ± 0.69 | mmol/l | 299 | -0.043 [-0.16; 0.074] | 0.46    | 299 | -0.052 [-0.18; 0.076] | 0.42    | 296 |
| PUFA                                         | 6.41 ± 0.82 | mmol/l | 299 | -0.054 [-0.18; 0.064] | 0.35    | 299 | -0.065 [-0.19; 0.064] | 0.31    | 296 |
| MUFA                                         | 4.89 ± 0.99 | mmol/l | 299 | 0.25 [0.13; 0.37]     | <0.0001 | 299 | 0.24 [0.12; 0.37]     | <0.0001 | 296 |
| SFA                                          | 6.15 ± 1.02 | mmol/l | 299 | 0.25 [0.13; 0.37]     | <0.0001 | 299 | 0.27 [0.14; 0.41]     | <0.0001 | 296 |
| Linoleic acid                                | 4.95 ± 0.79 | mmol/l | 299 | -0.040 [-0.16; 0.078] | 0.49    | 299 | -0.044 [-0.18; 0.079] | 0.50    | 296 |
| Docosahexaenoic acid                         | 441 ± 94    | μmol/l | 299 | -0.11 [-0.23; 0.015]  | 0.065   | 299 | -0.13 [-0.25; 0.002]  | 0.051   | 296 |
| Omega-3 FA / total FA                        | 4.49 ± 1.10 | %      | 299 | -0.20 [-0.32; -0.094] | 0.00038 | 299 | -0.22 [-0.34; -0.094] | 0.00070 | 296 |
| Omega-6 FA / total FA                        | 32.5 ± 2.5  | %      | 299 | -0.41 [-0.51; -0.30]  | <0.0001 | 299 | -0.42 [-0.54; -0.30]  | <0.0001 | 296 |
| PUFA / total FA                              | 37.0 ± 2.8  | %      | 299 | -0.45 [-0.56; -0.35]  | <0.0001 | 299 | -0.47 [-0.59; -0.35]  | <0.0001 | 296 |
| MUFA / total FA                              | 27.8 ± 2.1  | %      | 299 | 0.35 [0.25; 0.47]     | <0.0001 | 299 | 0.33 [0.21; 0.44]     | <0.0001 | 296 |

|                                     |             |        |     |                       |         |     |                       |         |     |
|-------------------------------------|-------------|--------|-----|-----------------------|---------|-----|-----------------------|---------|-----|
| SFA / total FA                      | 35.2 ± 1.4  | %      | 299 | 0.36 [0.25; 0.46]     | <0.0001 | 299 | 0.43 [0.31; 0.56]     | <0.0001 | 296 |
| Linoleic acid / total FA            | 28.4 ± 2.6  | %      | 299 | -0.35 [-0.45; -0.24]  | <0.0001 | 299 | -0.35 [-0.47; -0.23]  | <0.0001 | 296 |
| Docosahexaenoic acid / total FA     | 2.55 ± 0.53 | %      | 299 | -0.25 [-0.38; -0.14]  | <0.0001 | 299 | -0.27 [-0.40; -0.15]  | <0.0001 | 296 |
| PUFA / MUFA                         | 1.34 ± 0.20 | ratio  | 299 | -0.42 [-0.53; -0.31]  | <0.0001 | 299 | -0.41 [-0.52; -0.28]  | <0.0001 | 296 |
| Omega-6 FA / omega-3 FA             | 7.71 ± 2.20 | ratio  | 300 | 0.088 [-0.021; 0.20]  | 0.13    | 300 | 0.093 [-0.017; 0.21]  | 0.15    | 297 |
| Alanine                             | 362 ± 54    | μmol/l | 300 | 0.12 [-0.002; 0.25]   | 0.032   | 300 | 0.19 [0.060; 0.31]    | 0.0027  | 297 |
| Glutamine                           | 425 ± 63    | μmol/l | 298 | -0.11 [-0.23; 0.007]  | 0.052   | 298 | -0.14 [-0.27; -0.010] | 0.032   | 295 |
| Glycine                             | 188 ± 30    | μmol/l | 300 | -0.044 [-0.16; 0.077] | 0.45    | 300 | -0.040 [-0.16; 0.083] | 0.53    | 297 |
| Histidine                           | 83.4 ± 9.9  | μmol/l | 300 | -0.011 [-0.12; 0.11]  | 0.85    | 300 | 0.066 [-0.061; 0.20]  | 0.30    | 297 |
| Total BCAA                          | 314 ± 43    | μmol/l | 300 | 0.15 [0.029; 0.28]    | 0.0089  | 300 | 0.15 [0.013; 0.29]    | 0.021   | 297 |
| Isoleucine                          | 48.0 ± 9.5  | μmol/l | 300 | 0.13 [0.021; 0.24]    | 0.028   | 300 | 0.12 [-0.006; 0.24]   | 0.069   | 297 |
| Leucine                             | 93.7 ± 15.2 | μmol/l | 300 | 0.099 [-0.021; 0.23]  | 0.087   | 300 | 0.067 [-0.077; 0.20]  | 0.30    | 297 |
| Valine                              | 173 ± 23    | μmol/l | 300 | 0.16 [0.041; 0.30]    | 0.0045  | 300 | 0.18 [0.044; 0.34]    | 0.0041  | 297 |
| Phenylalanine                       | 81.9 ± 13.8 | μmol/l | 300 | 0.28 [0.16; 0.40]     | <0.0001 | 300 | 0.23 [0.10; 0.39]     | 0.00017 | 297 |
| Tyrosine                            | 46.2 ± 6.1  | μmol/l | 300 | 0.076 [-0.046; 0.20]  | 0.19    | 300 | 0.055 [-0.089; 0.19]  | 0.39    | 297 |
| Glycoprotein acetyls                | 1.01 ± 0.09 | mmol/l | 300 | 0.43 [0.33; 0.54]     | <0.0001 | 300 | 0.40 [0.29; 0.51]     | <0.0001 | 297 |
| Concentration of XXL-VLDL particles | 3.11 ± 2.22 | nmol/l | 300 | 0.39 [0.29; 0.50]     | <0.0001 | 300 | 0.41 [0.29; 0.54]     | <0.0001 | 297 |
| Total lipids in XXL-VLDL            | 279 ± 216   | μmol/l | 300 | 0.39 [0.29; 0.50]     | <0.0001 | 300 | 0.40 [0.28; 0.53]     | <0.0001 | 297 |
| Phospholipids in XXL-VLDL           | 39.6 ± 28.5 | μmol/l | 300 | 0.39 [0.29; 0.50]     | <0.0001 | 300 | 0.41 [0.29; 0.54]     | <0.0001 | 297 |
| Cholesterol in XXL-VLDL             | 83.4 ± 51.2 | μmol/l | 300 | 0.38 [0.27; 0.48]     | <0.0001 | 300 | 0.40 [0.29; 0.53]     | <0.0001 | 297 |
| Triglycerides in XXL-VLDL           | 156 ± 139   | μmol/l | 300 | 0.39 [0.29; 0.50]     | <0.0001 | 300 | 0.39 [0.27; 0.52]     | <0.0001 | 297 |
| Concentration of XL-VLDL particles  | 9.24 ± 4.23 | nmol/l | 300 | 0.33 [0.23; 0.45]     | <0.0001 | 300 | 0.35 [0.23; 0.49]     | <0.0001 | 297 |
| Total lipids in XL-VLDL             | 359 ± 175   | μmol/l | 300 | 0.34 [0.23; 0.45]     | <0.0001 | 300 | 0.36 [0.23; 0.48]     | <0.0001 | 297 |
| Phospholipids in XL-VLDL            | 74.5 ± 33.5 | μmol/l | 300 | 0.32 [0.22; 0.44]     | <0.0001 | 300 | 0.34 [0.22; 0.47]     | <0.0001 | 297 |
| Cholesterol in XL-VLDL              | 109 ± 44    | μmol/l | 300 | 0.25 [0.14; 0.36]     | <0.0001 | 300 | 0.27 [0.14; 0.40]     | <0.0001 | 297 |
| Triglycerides in XL-VLDL            | 176 ± 101   | μmol/l | 300 | 0.37 [0.26; 0.48]     | <0.0001 | 300 | 0.38 [0.26; 0.52]     | <0.0001 | 297 |
| Concentration of L-VLDL particles   | 25.8 ± 10.9 | nmol/l | 300 | 0.30 [0.19; 0.42]     | <0.0001 | 300 | 0.32 [0.19; 0.46]     | <0.0001 | 297 |
| Total lipids in L-VLDL              | 595 ± 257   | μmol/l | 300 | 0.30 [0.19; 0.42]     | <0.0001 | 300 | 0.32 [0.20; 0.46]     | <0.0001 | 297 |
| Phospholipids in L-VLDL             | 122 ± 52    | μmol/l | 300 | 0.30 [0.19; 0.41]     | <0.0001 | 300 | 0.32 [0.19; 0.45]     | <0.0001 | 297 |
| Cholesterol in L-VLDL               | 199 ± 78    | μmol/l | 300 | 0.23 [0.12; 0.35]     | <0.0001 | 300 | 0.25 [0.13; 0.39]     | <0.0001 | 297 |
| Triglycerides in L-VLDL             | 274 ± 132   | μmol/l | 300 | 0.33 [0.22; 0.45]     | <0.0001 | 300 | 0.35 [0.23; 0.50]     | <0.0001 | 297 |
| Concentration of M-VLDL particles   | 77.1 ± 24.3 | nmol/l | 300 | 0.11 [-0.006; 0.23]   | 0.049   | 300 | 0.12 [-0.017; 0.25]   | 0.056   | 297 |
| Total lipids in M-VLDL              | 960 ± 303   | μmol/l | 300 | 0.15 [0.043; 0.27]    | 0.0073  | 300 | 0.16 [0.033; 0.30]    | 0.0086  | 297 |
| Phospholipids in M-VLDL             | 206 ± 64    | μmol/l | 300 | 0.093 [-0.028; 0.21]  | 0.11    | 300 | 0.098 [-0.035; 0.22]  | 0.12    | 297 |
| Cholesterol in M-VLDL               | 295 ± 103   | μmol/l | 300 | -0.060 [-0.18; 0.064] | 0.30    | 300 | -0.061 [-0.20; 0.066] | 0.33    | 297 |
| Triglycerides in M-VLDL             | 459 ± 169   | μmol/l | 300 | 0.28 [0.17; 0.40]     | <0.0001 | 300 | 0.30 [0.18; 0.44]     | <0.0001 | 297 |
| Concentration of S-VLDL particles   | 110 ± 32    | nmol/l | 300 | 0.16 [0.050; 0.28]    | 0.0054  | 300 | 0.18 [0.046; 0.30]    | 0.0047  | 297 |
| Total lipids in S-VLDL              | 811 ± 228   | μmol/l | 300 | 0.14 [0.021; 0.25]    | 0.018   | 300 | 0.15 [0.019; 0.28]    | 0.016   | 297 |
| Phospholipids in S-VLDL             | 175 ± 50    | μmol/l | 300 | 0.087 [-0.035; 0.20]  | 0.13    | 300 | 0.096 [-0.039; 0.22]  | 0.12    | 297 |
| Cholesterol in S-VLDL               | 348 ± 103   | μmol/l | 300 | 0.059 [-0.063; 0.18]  | 0.31    | 300 | 0.069 [-0.061; 0.20]  | 0.27    | 297 |
| Triglycerides in S-VLDL             | 287 ± 84    | μmol/l | 300 | 0.24 [0.13; 0.37]     | <0.0001 | 300 | 0.27 [0.14; 0.40]     | <0.0001 | 297 |
| Concentration of XS-VLDL particles  | 161 ± 37    | nmol/l | 300 | 0.041 [-0.078; 0.15]  | 0.47    | 300 | 0.051 [-0.081; 0.18]  | 0.42    | 297 |
| Total lipids in XS-VLDL             | 806 ± 175   | μmol/l | 300 | 0.037 [-0.084; 0.16]  | 0.52    | 300 | 0.047 [-0.091; 0.18]  | 0.45    | 297 |
| Phospholipids in XS-VLDL            | 237 ± 53    | μmol/l | 300 | 0.071 [-0.050; 0.19]  | 0.22    | 300 | 0.084 [-0.056; 0.21]  | 0.18    | 297 |
| Cholesterol in XS-VLDL              | 418 ± 92    | μmol/l | 300 | -0.044 [-0.16; 0.076] | 0.45    | 300 | -0.038 [-0.17; 0.095] | 0.54    | 297 |
| Triglycerides in XS-VLDL            | 151 ± 36    | μmol/l | 300 | 0.19 [0.071; 0.30]    | 0.00098 | 300 | 0.21 [0.075; 0.33]    | 0.00079 | 297 |
| Concentration of IDL particles      | 571 ± 157   | nmol/l | 300 | -0.100 [-0.22; 0.025] | 0.085   | 300 | -0.10 [-0.23; 0.036]  | 0.11    | 297 |
| Total lipids in IDL                 | 1.90 ± 0.42 | mmol/l | 300 | -0.14 [-0.26; -0.019] | 0.019   | 300 | -0.14 [-0.27; -0.010] | 0.025   | 297 |
| Phospholipids in IDL                | 446 ± 91    | μmol/l | 300 | -0.14 [-0.26; -0.022] | 0.015   | 300 | -0.15 [-0.27; -0.014] | 0.021   | 297 |
| Cholesterol in IDL                  | 1.24 ± 0.30 | mmol/l | 300 | -0.17 [-0.29; -0.052] | 0.0031  | 300 | -0.18 [-0.31; -0.049] | 0.0048  | 297 |
| Triglycerides in IDL                | 213 ± 46    | μmol/l | 300 | 0.13 [0.006; 0.24]    | 0.024   | 300 | 0.14 [0.010; 0.27]    | 0.022   | 297 |
| Concentration of L-LDL particles    | 1.05 ± 0.29 | μmol/l | 300 | -0.075 [-0.20; 0.039] | 0.19    | 300 | -0.082 [-0.21; 0.047] | 0.20    | 297 |
| Total lipids in L-LDL               | 2.23 ± 0.53 | mmol/l | 300 | -0.098 [-0.22; 0.019] | 0.089   | 300 | -0.11 [-0.24; 0.024]  | 0.094   | 297 |
| Phospholipids in L-LDL              | 452 ± 104   | μmol/l | 300 | -0.13 [-0.24; -0.005] | 0.029   | 300 | -0.14 [-0.27; -0.009] | 0.033   | 297 |
| Cholesterol in L-LDL                | 1.57 ± 0.39 | mmol/l | 300 | -0.11 [-0.23; 0.010]  | 0.052   | 300 | -0.12 [-0.25; 0.010]  | 0.056   | 297 |
| Triglycerides in L-LDL              | 206 ± 46    | μmol/l | 300 | 0.11 [-0.005; 0.22]   | 0.058   | 300 | 0.12 [-0.012; 0.24]   | 0.058   | 297 |

|                                   |             |        |     |                       |         |     |                       |         |     |
|-----------------------------------|-------------|--------|-----|-----------------------|---------|-----|-----------------------|---------|-----|
| Concentration of M-LDL particles  | 476 ± 129   | nmol/l | 300 | -0.009 [-0.13; 0.10]  | 0.87    | 300 | -0.012 [-0.15; 0.11]  | 0.85    | 297 |
| Total lipids in M-LDL             | 907 ± 240   | μmol/l | 300 | -0.019 [-0.14; 0.11]  | 0.75    | 300 | -0.023 [-0.16; 0.10]  | 0.72    | 297 |
| Phospholipids in M-LDL            | 210 ± 53    | μmol/l | 300 | -0.043 [-0.16; 0.073] | 0.46    | 300 | -0.048 [-0.17; 0.081] | 0.45    | 297 |
| Cholesterol in M-LDL              | 629 ± 174   | μmol/l | 300 | -0.027 [-0.15; 0.090] | 0.65    | 300 | -0.031 [-0.16; 0.098] | 0.62    | 297 |
| Triglycerides in M-LDL            | 67.9 ± 15.9 | μmol/l | 300 | 0.15 [0.031; 0.26]    | 0.0084  | 300 | 0.16 [0.029; 0.29]    | 0.0095  | 297 |
| Concentration of S-LDL particles  | 313 ± 73    | nmol/l | 300 | 0.006 [-0.11; 0.13]   | 0.92    | 300 | 0.005 [-0.13; 0.14]   | 0.93    | 297 |
| Total lipids in S-LDL             | 443 ± 101   | μmol/l | 300 | -0.025 [-0.14; 0.094] | 0.67    | 300 | -0.028 [-0.16; 0.10]  | 0.66    | 297 |
| Phospholipids in S-LDL            | 132 ± 27    | μmol/l | 300 | -0.041 [-0.16; 0.075] | 0.48    | 300 | -0.041 [-0.18; 0.085] | 0.51    | 297 |
| Cholesterol in S-LDL              | 284 ± 69    | μmol/l | 300 | -0.043 [-0.16; 0.073] | 0.46    | 300 | -0.047 [-0.18; 0.081] | 0.45    | 297 |
| Triglycerides in S-LDL            | 26.9 ± 6.7  | μmol/l | 300 | 0.23 [0.12; 0.35]     | <0.0001 | 300 | 0.24 [0.11; 0.37]     | <0.0001 | 297 |
| Concentration of XL-HDL particles | 763 ± 197   | nmol/l | 300 | -0.17 [-0.28; -0.058] | 0.0030  | 300 | -0.17 [-0.29; -0.046] | 0.0077  | 297 |
| Total lipids in XL-HDL            | 379 ± 105   | μmol/l | 300 | -0.20 [-0.30; -0.084] | 0.00068 | 300 | -0.19 [-0.32; -0.074] | 0.0023  | 297 |
| Phospholipids in XL-HDL           | 193 ± 59    | μmol/l | 300 | -0.19 [-0.30; -0.079] | 0.0012  | 300 | -0.18 [-0.30; -0.066] | 0.0037  | 297 |
| Cholesterol in XL-HDL             | 169 ± 44    | μmol/l | 300 | -0.22 [-0.34; -0.12]  | <0.0001 | 300 | -0.23 [-0.35; -0.10]  | 0.00038 | 297 |
| Triglycerides in XL-HDL           | 16.9 ± 4.0  | μmol/l | 300 | 0.096 [-0.019; 0.21]  | 0.098   | 300 | 0.11 [-0.026; 0.24]   | 0.081   | 297 |
| Concentration of L-HDL particles  | 3.68 ± 1.17 | μmol/l | 300 | -0.22 [-0.33; -0.12]  | <0.0001 | 300 | -0.23 [-0.35; -0.12]  | 0.00022 | 297 |
| Total lipids in L-HDL             | 1.05 ± 0.33 | mmol/l | 300 | -0.23 [-0.34; -0.13]  | <0.0001 | 300 | -0.24 [-0.36; -0.13]  | 0.00012 | 297 |
| Phospholipids in L-HDL            | 497 ± 154   | μmol/l | 300 | -0.21 [-0.32; -0.11]  | 0.00029 | 300 | -0.22 [-0.33; -0.098] | 0.00057 | 297 |
| Cholesterol in L-HDL              | 488 ± 172   | μmol/l | 300 | -0.26 [-0.38; -0.17]  | <0.0001 | 300 | -0.28 [-0.39; -0.16]  | <0.0001 | 297 |
| Triglycerides in L-HDL            | 66.6 ± 14.3 | μmol/l | 300 | 0.046 [-0.065; 0.16]  | 0.43    | 300 | 0.058 [-0.064; 0.18]  | 0.36    | 297 |
| Concentration of M-HDL particles  | 5.42 ± 1.07 | μmol/l | 300 | -0.087 [-0.20; 0.019] | 0.13    | 300 | -0.11 [-0.23; 0.013]  | 0.083   | 297 |
| Total lipids in M-HDL             | 944 ± 185   | μmol/l | 300 | -0.055 [-0.17; 0.058] | 0.34    | 300 | -0.079 [-0.20; 0.052] | 0.21    | 297 |
| Phospholipids in M-HDL            | 442 ± 83    | μmol/l | 300 | -0.001 [-0.10; 0.12]  | 0.98    | 300 | -0.022 [-0.15; 0.11]  | 0.73    | 297 |
| Cholesterol in M-HDL              | 416 ± 106   | μmol/l | 300 | -0.14 [-0.25; -0.031] | 0.014   | 300 | -0.17 [-0.29; -0.043] | 0.0069  | 297 |
| Triglycerides in M-HDL            | 86.3 ± 18.2 | μmol/l | 300 | 0.28 [0.16; 0.38]     | <0.0001 | 300 | 0.30 [0.17; 0.42]     | <0.0001 | 297 |
| Concentration of S-HDL particles  | 11.2 ± 1.5  | μmol/l | 300 | 0.063 [-0.050; 0.17]  | 0.28    | 300 | 0.041 [-0.080; 0.16]  | 0.52    | 297 |
| Total lipids in S-HDL             | 1.01 ± 0.12 | mmol/l | 300 | 0.18 [0.073; 0.29]    | 0.0018  | 300 | 0.16 [0.048; 0.30]    | 0.010   | 297 |
| Phospholipids in S-HDL            | 572 ± 72    | μmol/l | 300 | 0.17 [0.065; 0.29]    | 0.0026  | 300 | 0.16 [0.035; 0.29]    | 0.014   | 297 |
| Cholesterol in S-HDL              | 360 ± 54    | μmol/l | 300 | 0.078 [-0.034; 0.19]  | 0.18    | 300 | 0.057 [-0.067; 0.18]  | 0.37    | 297 |
| Triglycerides in S-HDL            | 80.2 ± 18.9 | μmol/l | 300 | 0.30 [0.19; 0.41]     | <0.0001 | 300 | 0.32 [0.21; 0.45]     | <0.0001 | 297 |
| %Phospholipids in XXL-VLDL        | 14.9 ± 2.0  | %      | 271 | -0.19 [-0.30; -0.081] | 0.0019  | 271 | -0.15 [-0.27; -0.022] | 0.023   | 268 |
| %Cholesterol in XXL-VLDL          | 35.1 ± 11.2 | %      | 271 | -0.31 [-0.41; -0.20]  | <0.0001 | 271 | -0.29 [-0.40; -0.16]  | <0.0001 | 268 |
| %Triglycerides in XXL-VLDL        | 50.0 ± 12.7 | %      | 271 | 0.30 [0.19; 0.40]     | <0.0001 | 271 | 0.28 [0.14; 0.40]     | <0.0001 | 268 |
| %Phospholipids in XL-VLDL         | 21.2 ± 1.7  | %      | 299 | -0.34 [-0.47; -0.23]  | <0.0001 | 299 | -0.33 [-0.47; -0.20]  | <0.0001 | 296 |
| %Cholesterol in XL-VLDL           | 31.8 ± 5.2  | %      | 299 | -0.47 [-0.58; -0.36]  | <0.0001 | 299 | -0.47 [-0.58; -0.35]  | <0.0001 | 296 |
| %Triglycerides in XL-VLDL         | 47.0 ± 6.7  | %      | 299 | 0.45 [0.34; 0.57]     | <0.0001 | 299 | 0.45 [0.32; 0.57]     | <0.0001 | 296 |
| %Phospholipids in L-VLDL          | 20.6 ± 1.0  | %      | 300 | -0.053 [-0.18; 0.074] | 0.36    | 300 | -0.055 [-0.19; 0.088] | 0.39    | 297 |
| %Cholesterol in L-VLDL            | 34.2 ± 3.9  | %      | 300 | -0.38 [-0.49; -0.26]  | <0.0001 | 300 | -0.38 [-0.51; -0.24]  | <0.0001 | 297 |
| %Triglycerides in L-VLDL          | 45.3 ± 4.7  | %      | 300 | 0.33 [0.20; 0.44]     | <0.0001 | 300 | 0.33 [0.19; 0.47]     | <0.0001 | 297 |
| %Phospholipids in M-VLDL          | 21.5 ± 1.3  | %      | 300 | -0.38 [-0.48; -0.26]  | <0.0001 | 300 | -0.40 [-0.52; -0.27]  | <0.0001 | 297 |
| %Cholesterol in M-VLDL            | 30.9 ± 5.9  | %      | 300 | -0.42 [-0.52; -0.31]  | <0.0001 | 300 | -0.44 [-0.55; -0.31]  | <0.0001 | 297 |
| %Triglycerides in M-VLDL          | 47.6 ± 7.1  | %      | 300 | 0.41 [0.31; 0.52]     | <0.0001 | 300 | 0.43 [0.30; 0.55]     | <0.0001 | 297 |
| %Phospholipids in S-VLDL          | 21.6 ± 0.9  | %      | 300 | -0.39 [-0.50; -0.28]  | <0.0001 | 300 | -0.42 [-0.54; -0.29]  | <0.0001 | 297 |
| %Cholesterol in S-VLDL            | 42.9 ± 3.1  | %      | 300 | -0.33 [-0.44; -0.21]  | <0.0001 | 300 | -0.34 [-0.47; -0.20]  | <0.0001 | 297 |
| %Triglycerides in S-VLDL          | 35.5 ± 3.9  | %      | 300 | 0.34 [0.23; 0.45]     | <0.0001 | 300 | 0.36 [0.23; 0.49]     | <0.0001 | 297 |
| %Phospholipids in XS-VLDL         | 29.4 ± 0.7  | %      | 300 | 0.33 [0.23; 0.44]     | <0.0001 | 300 | 0.36 [0.25; 0.48]     | <0.0001 | 297 |
| %Cholesterol in XS-VLDL           | 51.8 ± 2.5  | %      | 300 | -0.40 [-0.50; -0.30]  | <0.0001 | 300 | -0.43 [-0.54; -0.31]  | <0.0001 | 297 |
| %Triglycerides in XS-VLDL         | 18.7 ± 1.8  | %      | 300 | 0.42 [0.32; 0.52]     | <0.0001 | 300 | 0.44 [0.33; 0.56]     | <0.0001 | 297 |
| %Phospholipids in IDL             | 23.6 ± 0.5  | %      | 300 | 0.099 [-0.023; 0.23]  | 0.087   | 300 | 0.11 [-0.024; 0.26]   | 0.077   | 297 |
| %Cholesterol in IDL               | 65.0 ± 2.0  | %      | 300 | -0.39 [-0.49; -0.29]  | <0.0001 | 300 | -0.43 [-0.55; -0.31]  | <0.0001 | 297 |
| %Triglycerides in IDL             | 11.4 ± 1.8  | %      | 300 | 0.42 [0.32; 0.52]     | <0.0001 | 300 | 0.46 [0.34; 0.57]     | <0.0001 | 297 |
| %Phospholipids in L-LDL           | 20.3 ± 0.6  | %      | 300 | -0.19 [-0.31; -0.059] | 0.0011  | 300 | -0.20 [-0.34; -0.061] | 0.0012  | 297 |
| %Cholesterol in L-LDL             | 70.3 ± 1.3  | %      | 300 | -0.30 [-0.41; -0.20]  | <0.0001 | 300 | -0.34 [-0.46; -0.22]  | <0.0001 | 297 |
| %Triglycerides in L-LDL           | 9.39 ± 1.51 | %      | 300 | 0.34 [0.25; 0.44]     | <0.0001 | 300 | 0.38 [0.26; 0.49]     | <0.0001 | 297 |
| %Phospholipids in M-LDL           | 23.3 ± 0.6  | %      | 300 | -0.24 [-0.35; -0.11]  | <0.0001 | 300 | -0.25 [-0.38; -0.11]  | <0.0001 | 297 |
| %Cholesterol in M-LDL             | 69.1 ± 1.3  | %      | 300 | -0.18 [-0.29; -0.072] | 0.0020  | 300 | -0.20 [-0.34; -0.081] | 0.0016  | 297 |

|                          |             |   |     |                       |         |     |                       |         |     |
|--------------------------|-------------|---|-----|-----------------------|---------|-----|-----------------------|---------|-----|
| %Triglycerides in M-LDL  | 7.66 ± 1.29 | % | 300 | 0.28 [0.18; 0.38]     | <0.0001 | 300 | 0.31 [0.19; 0.42]     | <0.0001 | 297 |
| %Phospholipids in S-LDL  | 29.9 ± 1.0  | % | 300 | -0.064 [-0.17; 0.060] | 0.27    | 300 | -0.047 [-0.17; 0.084] | 0.46    | 297 |
| %Cholesterol in S-LDL    | 63.9 ± 1.6  | % | 300 | -0.23 [-0.34; -0.12]  | <0.0001 | 300 | -0.26 [-0.38; -0.14]  | <0.0001 | 297 |
| %Triglycerides in S-LDL  | 6.14 ± 1.01 | % | 300 | 0.42 [0.32; 0.52]     | <0.0001 | 300 | 0.45 [0.33; 0.57]     | <0.0001 | 297 |
| %Phospholipids in XL-HDL | 50.6 ± 2.0  | % | 300 | -0.12 [-0.23; -0.006] | 0.046   | 300 | -0.10 [-0.22; 0.023]  | 0.11    | 297 |
| %Cholesterol in XL-HDL   | 44.8 ± 1.5  | % | 300 | -0.14 [-0.26; -0.023] | 0.016   | 300 | -0.17 [-0.31; -0.039] | 0.0074  | 297 |
| %Triglycerides in XL-HDL | 4.68 ± 1.42 | % | 300 | 0.31 [0.21; 0.43]     | <0.0001 | 300 | 0.32 [0.20; 0.47]     | <0.0001 | 297 |
| %Phospholipids in L-HDL  | 47.4 ± 1.6  | % | 300 | 0.28 [0.16; 0.41]     | <0.0001 | 300 | 0.30 [0.16; 0.45]     | <0.0001 | 297 |
| %Cholesterol in L-HDL    | 45.7 ± 3.3  | % | 300 | -0.35 [-0.45; -0.26]  | <0.0001 | 300 | -0.37 [-0.49; -0.26]  | <0.0001 | 297 |
| %Triglycerides in L-HDL  | 6.87 ± 2.80 | % | 300 | 0.24 [0.16; 0.34]     | <0.0001 | 300 | 0.26 [0.17; 0.38]     | <0.0001 | 297 |
| %Phospholipids in M-HDL  | 46.9 ± 1.2  | % | 300 | 0.40 [0.28; 0.51]     | <0.0001 | 300 | 0.43 [0.29; 0.56]     | <0.0001 | 297 |
| %Cholesterol in M-HDL    | 43.5 ± 3.7  | % | 300 | -0.30 [-0.42; -0.20]  | <0.0001 | 300 | -0.34 [-0.46; -0.22]  | <0.0001 | 297 |
| %Triglycerides in M-HDL  | 9.52 ± 2.98 | % | 300 | 0.22 [0.11; 0.33]     | 0.00014 | 300 | 0.25 [0.12; 0.38]     | <0.0001 | 297 |
| %Phospholipids in S-HDL  | 56.5 ± 1.8  | % | 300 | -0.015 [-0.13; 0.10]  | 0.80    | 300 | -0.022 [-0.15; 0.11]  | 0.73    | 297 |
| %Cholesterol in S-HDL    | 35.5 ± 2.2  | % | 300 | -0.16 [-0.27; -0.050] | 0.0051  | 300 | -0.18 [-0.31; -0.051] | 0.0044  | 297 |
| %Triglycerides in S-HDL  | 7.98 ± 1.87 | % | 300 | 0.20 [0.085; 0.31]    | 0.00045 | 300 | 0.23 [0.10; 0.36]     | 0.00019 | 297 |
